# Supplementary material
Source: PubMed Central journal article supplement (PMC17289)

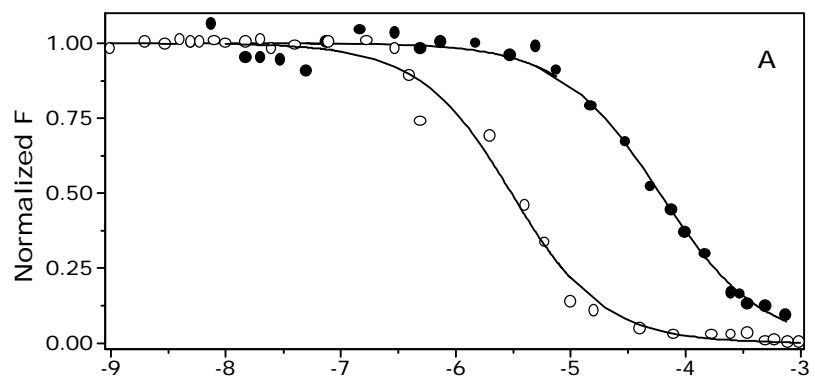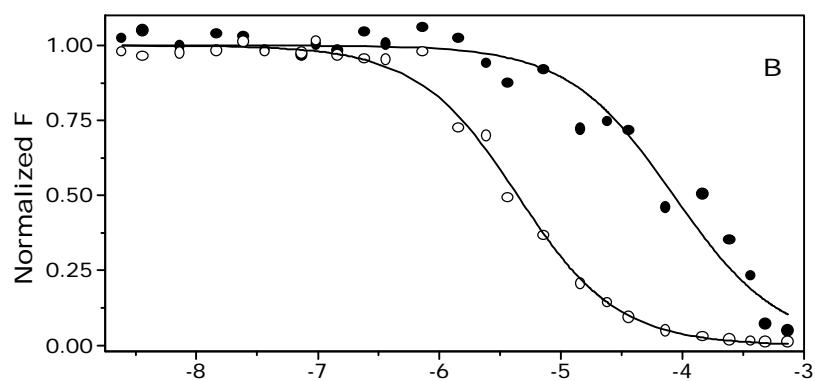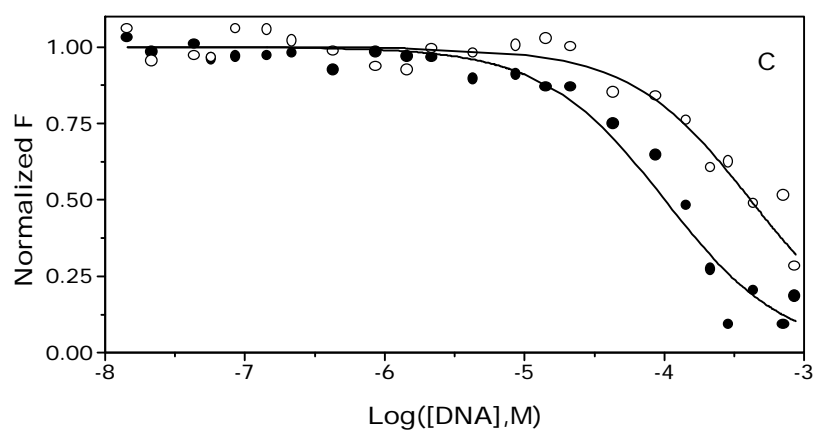

Supplement: pnas_97_22_12032__2.pdf [file pnas_97_22_12032__2.pdf]

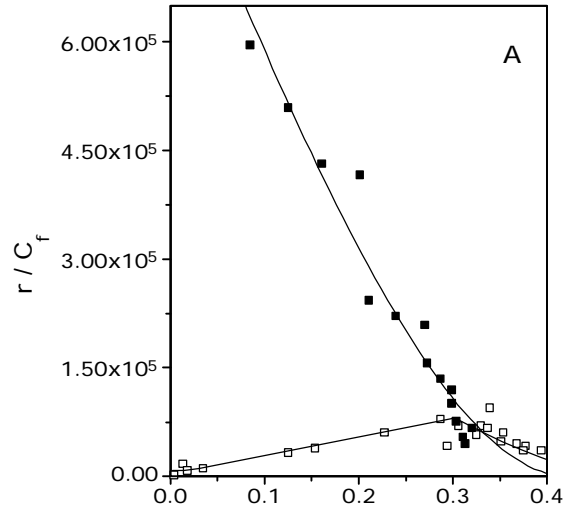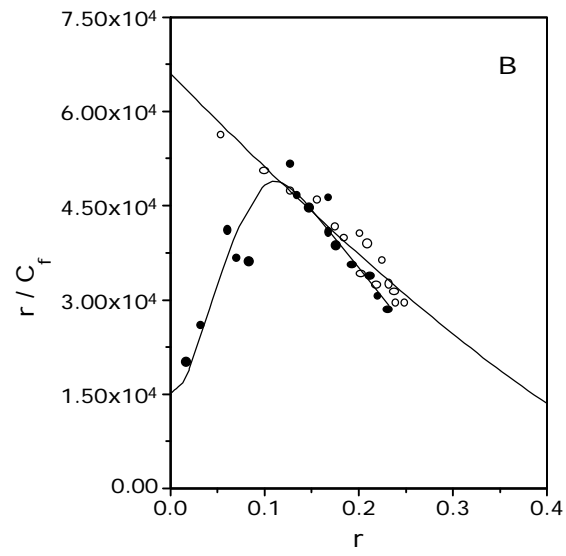

Supplement: pnas_97_22_12032__4.pdf [file pnas_97_22_12032__4.pdf]
